# Supplementary material for: Rapid Intraoperative Diagnosis of Pediatric Brain Tumors Using Stimulated Raman Histology
Source: Oxford University Press journal article supplement (doi:10.1158/0008-5472.can-17-1974), 2017-11-01
Supplement: 00085472can171974-sup-185609_2_supp_4311296_5xb705.docx [file 00085472can171974-sup-185609_2_supp_4311296_5xb705.docx]

| **Feature Category** | **CellProfiler Module** | **Feature Examples** |
| --- | --- | --- |
| Image Processing | ColorToGray | Split CH2 and CH3-CH2 channels for parallel image processing |
| Image Processing | ImageMath | CH2 and CH3-CH2 post-processing to enhance image feature contrast |
| Image Processing | ApplyThreshold | Remove pixels intensities below set threshold to eliminate noise and image granularity |
| Image Processing | EnhanceOrSuppressFeatures | Suppress speckles, ring shapes, neurites to improve object identification |
| Object Processing | IdentifyPrimaryObjects | Axonal segmentation using CH2 channel |
| Image Processing | FilterObjects | Generate axon filter to remove from subsequent CH2 channel image processing |
| Object Processing | MaskImages | Mask axons from CH2 images |
| Object Processing | IdentifyPrimaryObjects | Identify and count TAMs using masked CH2 images |
| Object Processing | IdentifyPrimaryObjects | Segment and count nuclei using CH3-CH2 images |
| Measurement | MeasureObjectSizeShape | Measure segmented nuclei area and shape features |
| File Processing | ExportToSpreadsheet | Export results for machine learning input |

**Supplementary Table 1. CellProfiler pipeline for quantitative SRH**
